# Supplementary material for: Host miR-146a-3p Facilitates Replication of Infectious Hematopoietic Necrosis Virus by Targeting WNT3a and CCND1
Source: MDPI journal article supplement (doi:10.3390/vetsci11050204), 2024-05-08
Supplement: s1 [file s1]

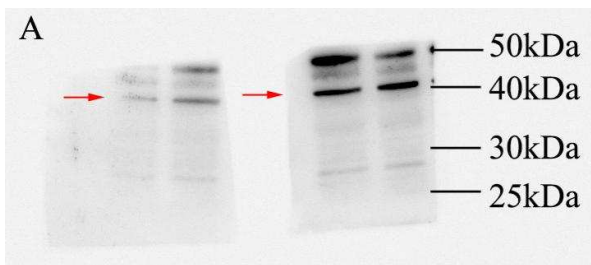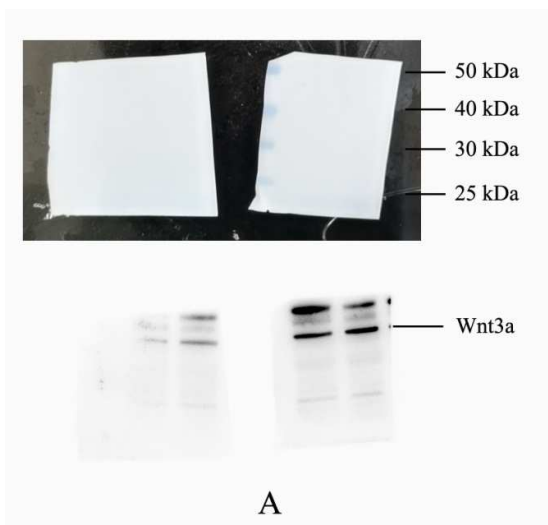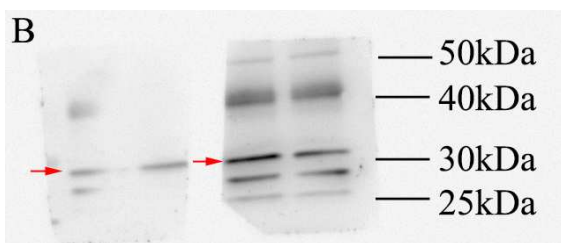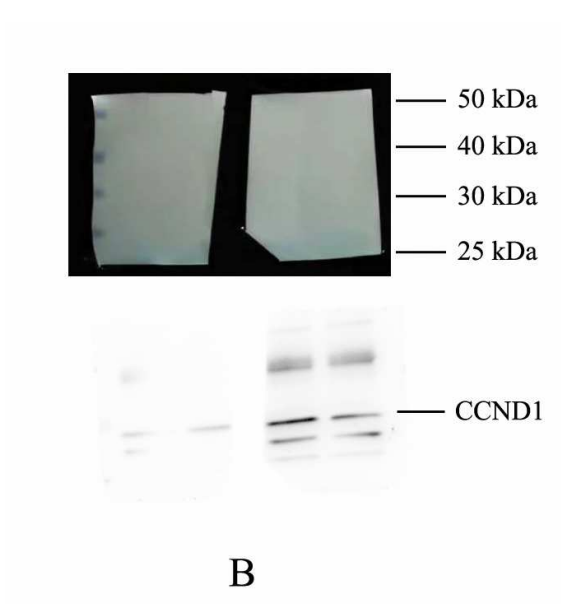

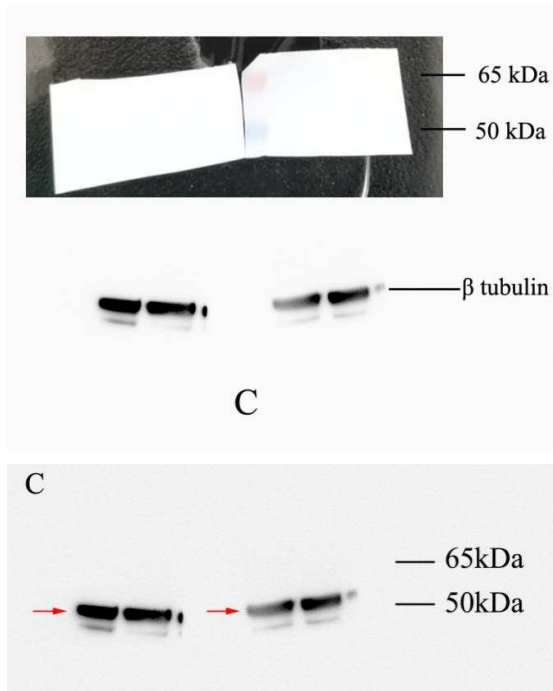

**Raw data for the Western blotting analysis.** RTG-2 cells were transfected with miRNA-146a-3p mimic or NC mimic and miRNA-146a-3p inhibitor or NC inhibitor for 24 h. Then, the cells were lysed and the target protein bands were detected using the corresponding antibody. The primary antibodies were anti-WNT3a (A), anti-CCND1(B), and anti-β tubulin (C).
